# Supplementary material for: Institutional Change and Early-Stage Start-Up Selection: Evidence from Applicants to Venture Accelerators
Source: Atypon-hosted journal article supplement (doi:10.1287/orsc.2020.1390), 2020-11-30
Supplement: orsc.2020.1390.sm1.pdf [file orsc.2020.1390.sm1.pdf]

**SUPPLEMENTARY MATERIALS FOR:**  
**Institutional Change and Early-Stage Startup Selection:**  
**Evidence from Applicants to Venture Accelerators**

Valentina A. Assenova\*<sup>1</sup>

<sup>1</sup>The Wharton School, University of Pennsylvania

June 20, 2020

**Abstract**

Existing research at the nexus of institutional theory and entrepreneurship suggests that lowering institutional barriers to forming, growing, and exiting new firms can affect the types of startups that entrepreneurs found in a region. These institutional changes could influence entrepreneurs' perceptions of the value of partnering with venture accelerators and potentially improve these sponsors' capacity to select high-growth startups to fund and develop. This study evaluates these ideas by developing and testing three hypotheses. First, institutional reforms improve entrepreneurs' perceived value of venture accelerators for resources that affect new venture development. Second, they reduce the average probability of being selected for new applicants, due to a surge in the number and heterogeneity of new applicants within accelerators' local ecosystems. Third, institutional reforms increase the quality of selected cohorts for accelerator managers due to increases in the average quality and human capital of new applicants. To evaluate these hypotheses, I analyze data from 13,770 applicants to venture accelerators over multiple application cycles between 2016-2018 in 170 countries. I use a differences-in-differences design to estimate the effects of institutional changes on startup selection after regulatory reforms that reduced the time and procedures to start new firms, obtain credit, and resolve bankruptcy for entrepreneurs. The findings have valuable implications for how governments, especially those in emerging and developing economies, can support high-growth entrepreneurship.

**Keywords:** Entrepreneurship; Institutions; Accelerators; Performance; Selection

---

\*Correspondence: vaa@wharton.upenn.edu. Address: Management Department, 3620 Locust Walk, Philadelphia, PA 19104. The author gratefully acknowledges funding from the Wharton Center for Global Initiatives and helpful comments from two anonymous reviewers and the following colleagues (in alphabetical order): Raffi Amit, Daniel Armanios, Gary Dushnitsky, Bob Eberhart, Chuck Eesley, Emilie Feldman, Claudine Gartenberg, Aline Gatignon, Jorge Guzman, David Hsu, David Kirsch, Jax Kirtley, Katherine Klein, Mae McDonnell, Ethan Mollick, Lori Rosenkopf, Lynn Selhat, Wes Sine, Minyuan Zhao, and seminar participants at Wharton, Cornell, and Stanford. The data were provided by the Entrepreneurship Database Program at Emory University, supported by the Global Accelerator Learning Initiative. The views and analyses expressed in this article are solely those of the author. The author declares no relevant or material financial interests that relate to the research described in this paper.

# A Supplementary Materials

Table A1: Summary Statistics and Correlations Matrix

|                                                                        | Mean   | S.D.   | (1)   | (2)   | (3)   | (4)   | (5)   | (6)   | (7)   | (8)   | (9)   |
|------------------------------------------------------------------------|--------|--------|-------|-------|-------|-------|-------|-------|-------|-------|-------|
| (1) Accelerator Benefit: Network development (1-7, 7=best)             | 4.658  | 1.917  | 1     |       |       |       |       |       |       |       |       |
| (2) Accelerator Benefit: Business skills development (1-7, 7=best)     | 4.046  | 1.989  | -0.11 | 1     |       |       |       |       |       |       |       |
| (3) Accelerator Benefit: Securing direct venture funding (1-7, 7=best) | 4.519  | 2.006  | -0.29 | -0.3  | 1     |       |       |       |       |       |       |
| (4) Total Revenue (Ln USD)                                             | 6.006  | 5.252  | 0.04  | 0.01  | 0.03  | 1     |       |       |       |       |       |
| (5) Employees (Ln count)                                               | 1.338  | 1.176  | -0.01 | 0.03  | 0.05  | 0.5   | 1     |       |       |       |       |
| (6) Patents (Ln count)                                                 | 0.142  | 0.502  | 0.03  | -0.02 | 0     | 0.03  | 0.07  | 1     |       |       |       |
| (7) Founders' Education (level)                                        | 1.814  | 0.353  | 0.01  | -0.02 | 0     | 0.08  | 0.07  | 0.02  | 1     |       |       |
| (8) Founders' Work Experience (years)                                  | 2.103  | 0.713  | -0.01 | 0.01  | 0     | 0.12  | 0.17  | 0.09  | 0.16  | 1     |       |
| (9) Female co-founder                                                  | 0.559  | 0.497  | -0.01 | 0.13  | -0.02 | 0.01  | 0     | 0     | 0.01  | 0.03  | 1     |
| (10) Applicants (number)                                               | 75.772 | 90.707 | 0     | -0.04 | 0.04  | -0.09 | 0     | -0.03 | -0.04 | -0.05 | -0.02 |
| (11) Cohort Heterogeneity (0-100, 100=diverse)                         | 79.82  | 29.766 | 0     | -0.05 | 0.05  | 0.01  | 0.03  | 0.01  | 0.02  | 0     | -0.01 |
| (12) Company Age                                                       | 2.41   | 3.746  | -0.01 | 0.05  | 0.05  | 0.28  | 0.32  | 0.09  | 0.08  | 0.21  | 0.03  |
| (13) Cohort Size (count)                                               | 11.168 | 16.02  | -0.06 | 0.06  | -0.04 | -0.16 | -0.13 | -0.05 | -0.07 | -0.05 | 0.06  |
| (14) Operational Model: Production / Manufacturing                     | 0.34   | 0.474  | -0.03 | 0.11  | 0.02  | 0.04  | 0.1   | 0.15  | 0.04  | 0.06  | 0.07  |
| (15) Operational Model: Processing / Packaging                         | 0.168  | 0.374  | -0.02 | 0.12  | 0     | 0.07  | 0.11  | 0.02  | 0.01  | 0.05  | 0.1   |
| (16) Operational Model: Distribution                                   | 0.258  | 0.437  | -0.01 | 0.06  | 0.01  | 0.1   | 0.09  | 0.04  | -0.02 | 0.02  | 0.08  |
| (17) Operational Model: Wholesale / Retail                             | 0.228  | 0.42   | -0.02 | 0.11  | -0.02 | 0.11  | 0.07  | 0.01  | 0.01  | 0.05  | 0.12  |
| (18) Operational Model: Services                                       | 0.646  | 0.478  | 0.04  | -0.04 | -0.01 | 0.01  | -0.05 | -0.05 | -0.01 | -0.06 | -0.05 |
| (19) Operational Model: Financial Services                             | 0.149  | 0.356  | 0.02  | -0.08 | -0.02 | 0     | 0.04  | -0.03 | -0.03 | -0.01 | -0.1  |
| (20) Venture is invention based                                        | 0.613  | 0.487  | 0     | -0.07 | 0.03  | -0.02 | 0.05  | 0.16  | 0     | 0.02  | -0.1  |
|                                                                        | (10)   | (11)   | (12)  | (13)  | (14)  | (15)  | (16)  | (17)  | (18)  | (19)  | (20)  |
| (10) Applicants (number)                                               | 1      |        |       |       |       |       |       |       |       |       |       |
| (11) Cohort Heterogeneity (0-100, 100=diverse)                         | 0.13   | 1      |       |       |       |       |       |       |       |       |       |
| (12) Company Age                                                       | -0.06  | -0.02  | 1     |       |       |       |       |       |       |       |       |
| (13) Cohort Size (count)                                               | 0.29   | -0.38  | -0.08 | 1     |       |       |       |       |       |       |       |
| (14) Operational Model: Production / Manufacturing                     | 0.01   | -0.02  | 0.12  | 0     | 1     |       |       |       |       |       |       |
| (15) Operational Model: Processing / Packaging                         | 0.03   | -0.02  | 0.08  | 0     | 0.39  | 1     |       |       |       |       |       |
| (16) Operational Model: Distribution                                   | -0.02  | -0.02  | 0.08  | -0.02 | 0.32  | 0.46  | 1     |       |       |       |       |
| (17) Operational Model: Wholesale / Retail                             | -0.04  | -0.02  | 0.08  | 0.01  | 0.31  | 0.42  | 0.46  | 1     |       |       |       |
| (18) Operational Model: Services                                       | 0.03   | 0.03   | -0.02 | -0.05 | -0.37 | -0.23 | -0.13 | -0.2  | 1     |       |       |
| (19) Operational Model: Financial Services                             | -0.07  | 0.03   | -0.05 | -0.08 | -0.19 | -0.09 | -0.06 | -0.07 | -0.12 | 1     |       |
| (20) Venture is invention based                                        | 0.04   | 0.07   | -0.02 | -0.07 | 0.06  | -0.04 | -0.03 | -0.08 | 0.02  | 0.07  | 1     |

Table A2: Robustness Checks: Cohort Size and Number of Accelerators

| A: ENTRY BARRIERS<br>REDUCED in 2017  | Cohort Size   |              | Accelerators (count) |              |
|---------------------------------------|---------------|--------------|----------------------|--------------|
|                                       | coeff.        | p-value      | coeff.               | p-value      |
| Before                                |               |              |                      |              |
| Control                               | 9.226         |              | 107.15               |              |
| Treated                               | 4.391         |              | 148.444              |              |
| Diff (T-C)                            | -4.836        | 0.036        | 41.294               | 0.629        |
| After                                 |               |              |                      |              |
| Control                               | 9.143         |              | 114.141              |              |
| Treated                               | 8.601         |              | 248.25               |              |
| Diff (T-C)                            | -0.542        | 0.825        | 134.109              | 0.241        |
| <b>Diff-in-Diff</b>                   | <b>4.294</b>  | <b>0.202</b> | <b>92.814</b>        | <b>0.516</b> |
| <i>N</i>                              | 253           |              | 348                  |              |
| B: GROWTH BARRIERS<br>REDUCED in 2017 | Cohort Size   |              | Accelerators (count) |              |
|                                       | coeff.        | p-value      | coeff.               | p-value      |
| Before                                |               |              |                      |              |
| Control                               | 8.98          |              | 108.111              |              |
| Treated                               | 3.779         |              | 148                  |              |
| Diff (T-C)                            | -5.201        | 0.075        | 39.889               | 0.671        |
| After                                 |               |              |                      |              |
| Control                               | 9.097         |              | 131.835              |              |
| Treated                               | 8.733         |              | 148.136              |              |
| Diff (T-C)                            | -0.363        | 0.889        | 16.301               | 0.872        |
| <b>Diff-in-Diff</b>                   | <b>4.838</b>  | <b>0.216</b> | <b>-23.588</b>       | <b>0.864</b> |
| <i>N</i>                              | 253           |              | 348                  |              |
| C: EXIT BARRIERS<br>REDUCED in 2017   | Cohort Size   |              | Accelerators (count) |              |
|                                       | coeff.        | p-value      | coeff.               | p-value      |
| Before                                |               |              |                      |              |
| Control                               | 7.64          |              | 127.25               |              |
| Treated                               | 11.993        |              | 57.255               |              |
| Diff (T-C)                            | 4.353         | 0.079        | -69.995              | 0.274        |
| After                                 |               |              |                      |              |
| Control                               | 9.599         |              | 196.111              |              |
| Treated                               | 7.365         |              | 65.617               |              |
| Diff (T-C)                            | -2.234        | 0.362        | -130.494             | 0.118        |
| <b>Diff-in-Diff</b>                   | <b>-6.587</b> | <b>0.059</b> | <b>-60.499</b>       | <b>0.565</b> |
| <i>N</i>                              | 253           |              | 348                  |              |

Note: Means estimated by linear regression; p-values based on two-tailed hypothesis tests.

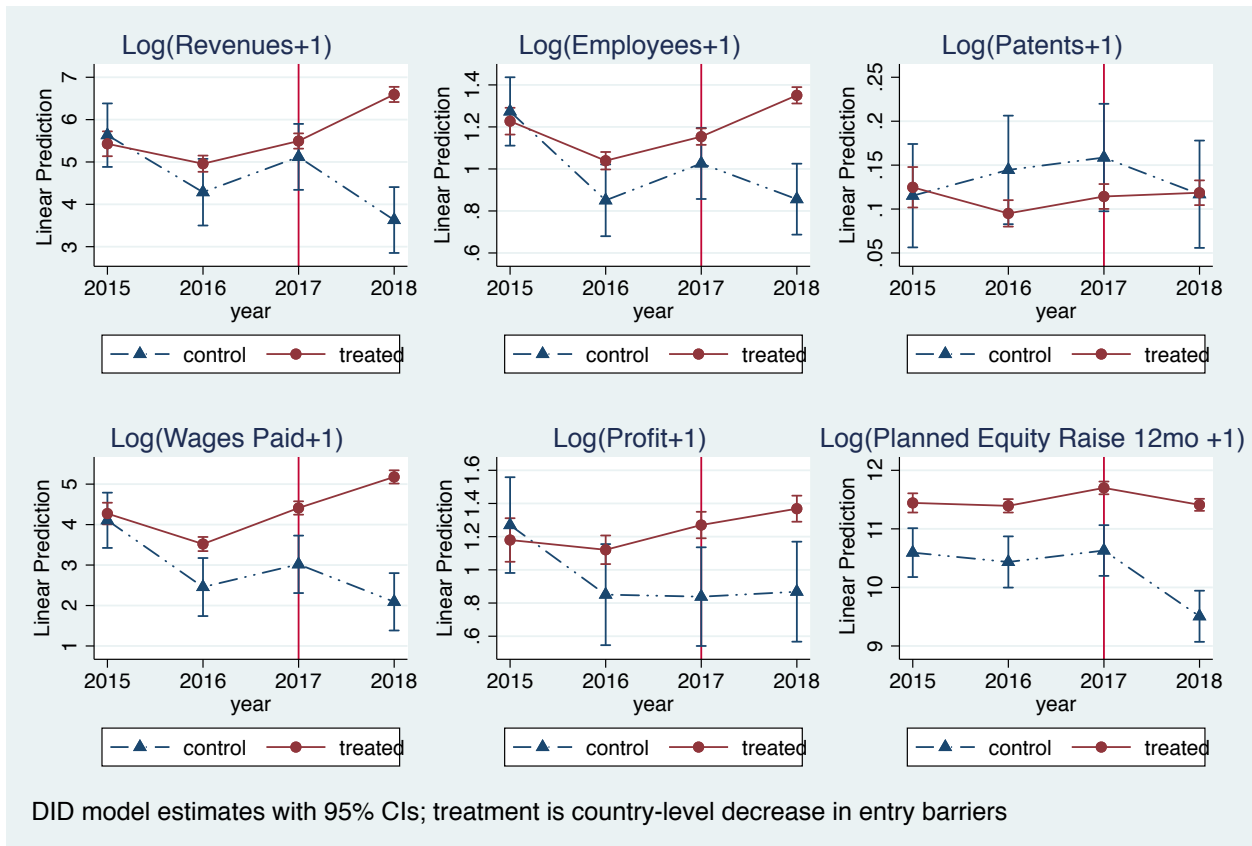

Figure A1: Tests for Common Pre-Treatment Dynamics (“Parallel Trends”)

Table A3: Robustness Checks: Mora-Reggio Tests for Common Pre-Treatment Dynamics

| Outcome                           | Parallel Trends |         |
|-----------------------------------|-----------------|---------|
|                                   | test statistic  | p-value |
| Log(Revenues+1)                   | -0.1282607      | 0.6857  |
| Log(Employees+1)                  | -0.0037083      | 0.9589  |
| Log(Patents+1)                    | 0.0013794       | 0.9648  |
| Log(Wages Paid +1)                | 0.5164094       | 0.0645  |
| Log(Profit+1)                     | 0.1747615       | 0.1338  |
| Log(Planned Equity Raise 12mo +1) | 0.2012817       | 0.2256  |

Table A4: Robustness checks: Additional Performance Metrics

| Panel A: Reduction in Entry Barriers | DD coefficient | p-value |
|--------------------------------------|----------------|---------|
| Log(Revenues+1)                      | 2.406          | 0.000   |
| Log(Employees+1)                     | 0.455          | 0.001   |
| Log(Patents+1)                       | 0.022          | 0.571   |
| Log(Wages Paid+1)                    | 1.612          | 0.004   |
| Log(Profit+1)                        | 0.104          | 0.667   |
| Log(Planned Equity Raise 12mo+1)     | -0.092         | 0.781   |

  

| Panel B: Reduction in Growth Barriers | DD coefficient | p-value |
|---------------------------------------|----------------|---------|
| Log(Revenues+1)                       | 3.187          | 0.000   |
| Log(Employees+1)                      | 0.443          | 0.002   |
| Log(Patents+1)                        | -0.016         | 0.697   |
| Log(Wages Paid+1)                     | 1.75           | 0.004   |
| Log(Profit+1)                         | 0.177          | 0.494   |
| Log(Planned Equity Raise 12mo+1)      | -0.323         | 0.352   |

  

| Panel C: Reduction in Exit Barriers | DD coefficient | p-value |
|-------------------------------------|----------------|---------|
| Log(Revenues+1)                     | 1.501          | 0.005   |
| Log(Employees+1)                    | 0.51           | 0.000   |
| Log(Patents+1)                      | 0.028          | 0.408   |
| Log(Wages Paid+1)                   | 2.131          | 0.000   |
| Log(Profit+1)                       | 0.076          | 0.702   |
| Log(Planned Equity Raise 12mo+1)    | 1.258          | 0.000   |

Table A5: Robustness check: Split Sample Analyses of Accelerator Applicants by Equity Funding

| Panel A: Reduction in Entry Barriers            |                | No Equity Funding |                | Equity Funding |         |
|-------------------------------------------------|----------------|-------------------|----------------|----------------|---------|
| Outcome                                         | DD coefficient | p-value           | DD coefficient | p-value        |         |
| Number of Applicants                            | 129.085        | 0.000             | 115.154        | 0.000          |         |
| Prob. Selected                                  | -0.059         | 0.001             | 0.03           | 0.59           |         |
| Applicant Heterogeneity (Industry, Stage)       | 5.482          | 0.000             | 2.116          | 0.547          |         |
| Applicant Quality: Log(Revenue+1)               | 0.49           | 0.034             | -0.357         | 0.594          |         |
| Applicant Quality: Log(Employees+1)             | 0.176          | 0.000             | -0.25          | 0.074          |         |
| Applicant Quality: Log(Patents+1)               | 0.019          | 0.281             | -0.051         | 0.428          |         |
| Perceived Benefits: Network Development         | 0.25           | 0.003             | 0.063          | 0.812          |         |
| Perceived Benefits: Business Skills Development | 0.152          | 0.086             | -0.012         | 0.963          |         |
| Perceived Benefits: Direct Venture Funding      | -0.412         | 0.000             | -0.331         | 0.212          |         |
| Applicant Human Capital: Team Education         | 0.082          | 0.001             | -0.084         | 0.202          |         |
| Applicant Human Capital: Team Experience        | -0.199         | 0.001             | -0.248         | 0.116          |         |
| Applicant Human Capital: Female Co-Founders     | 0.013          | 0.546             | -0.106         | 0.099          |         |
| Panel B: Reduction in Growth Barriers           |                | DD coefficient    | p-value        | DD coefficient | p-value |
| Number of Applicants                            | 137.83         | 0.000             | 123.778        | 0.000          |         |
| Prob. Selected                                  | -0.072         | 0.000             | 0.006          | 0.912          |         |
| Applicant Heterogeneity (Industry, Stage)       | 6.606          | 0.000             | 4.602          | 0.21           |         |
| Applicant Quality: Log(Revenue+1)               | 0.904          | 0.000             | -0.284         | 0.686          |         |
| Applicant Quality: Log(Employees+1)             | 0.34           | 0.000             | 0.031          | 0.833          |         |
| Applicant Quality: Log(Patents+1)               | 0.012          | 0.547             | 0.043          | 0.523          |         |
| Perceived Benefits: Network Development         | 0.296          | 0.001             | 0.052          | 0.85           |         |
| Perceived Benefits: Business Skills Development | 0.21           | 0.028             | 0.252          | 0.356          |         |
| Perceived Benefits: Direct Venture Funding      | -0.366         | 0.000             | -0.177         | 0.524          |         |
| Applicant Human Capital: Team Education         | 0.105          | 0.000             | -0.109         | 0.12           |         |
| Applicant Human Capital: Team Experience        | -0.098         | 0.165             | 0.154          | 0.364          |         |
| Applicant Human Capital: Female Co-Founders     | 0.041          | 0.089             | -0.068         | 0.309          |         |
| Panel C: Reduction in Exit Barriers             |                | DD coefficient    | p-value        | DD coefficient | p-value |
| Number of Applicants                            | 63.068         | 0.000             | 32.662         | 0.005          |         |
| Prob. Selected                                  | -0.084         | 0.000             | 0.089          | 0.102          |         |
| Applicant Heterogeneity (Industry, Stage)       | 7.803          | 0.000             | -2.654         | 0.434          |         |
| Applicant Quality: Log(Revenue+1)               | 1.659          | 0.000             | 0.115          | 0.858          |         |
| Applicant Quality: Log(Employees+1)             | 0.531          | 0.000             | 0.155          | 0.256          |         |
| Applicant Quality: Log(Patents+1)               | 0.048          | 0.007             | 0.029          | 0.635          |         |
| Perceived Benefits: Network Development         | 0.216          | 0.014             | -0.334         | 0.19           |         |
| Perceived Benefits: Business Skills Development | 0.094          | 0.305             | 0.478          | 0.057          |         |
| Perceived Benefits: Direct Venture Funding      | 0.344          | 0.000             | -0.003         | 0.99           |         |
| Applicant Human Capital: Team Education         | 0.124          | 0.000             | 0.136          | 0.036          |         |
| Applicant Human Capital: Team Experience        | 0.075          | 0.296             | -0.134         | 0.381          |         |
| Applicant Human Capital: Female Co-Founders     | 0.014          | 0.54              | -0.007         | 0.911          |         |

Table A6: Robustness Checks: Triple Differences Effects on Perceived Benefits among Entrepreneurs

| Panel A: Reduction in Entry Barriers |             | Differences-in-Differences (DD)<br>Entry Barriers Reduced |             | Triple Differences (DDD)<br>Entry and Growth Barriers Reduced |             | Triple Differences (DDD)<br>Entry and Exit Barriers Reduced |  |
|--------------------------------------|-------------|-----------------------------------------------------------|-------------|---------------------------------------------------------------|-------------|-------------------------------------------------------------|--|
| Outcomes                             | coefficient | p-value                                                   | coefficient | p-value                                                       | coefficient | p-value                                                     |  |
| Network Development                  | 0.218       | 0.007                                                     | -0.162      | 0.627                                                         | -0.138      | 0.459                                                       |  |
| Business Skills Development          | 0.15        | 0.074                                                     | -0.576      | 0.095                                                         | -0.141      | 0.463                                                       |  |
| Securing Direct Venture Funding      | -0.393      | 0.000                                                     | 0.586       | 0.105                                                         | 0.14        | 0.487                                                       |  |
| Team Education                       | 0.058       | 0.015                                                     | -0.138      | 0.17                                                          | -0.074      | 0.189                                                       |  |
| Team Experience                      | -0.214      | 0.000                                                     | -0.371      | 0.119                                                         | 0.052       | 0.712                                                       |  |
| Female Co-Founders                   | 0.007       | 0.74                                                      | -0.119      | 0.168                                                         | -0.055      | 0.252                                                       |  |

  

| Panel B: Reduction in Growth Barriers |             | Differences-in-Differences (DD)<br>Growth Barriers Reduced |             | Triple Differences (DDD)<br>Growth and Entry Barriers Reduced |             | Triple Differences (DDD)<br>Growth and Exit Barriers Reduced |  |
|---------------------------------------|-------------|------------------------------------------------------------|-------------|---------------------------------------------------------------|-------------|--------------------------------------------------------------|--|
| Outcome                               | coefficient | p-value                                                    | coefficient | p-value                                                       | coefficient | p-value                                                      |  |
| Network Development                   | 0.26        | 0.003                                                      | -0.162      | 0.627                                                         | -0.043      | 0.827                                                        |  |
| Business Skills Development           | 0.234       | 0.010                                                      | -0.576      | 0.095                                                         | -0.212      | 0.295                                                        |  |
| Securing Direct Venture Funding       | -0.339      | 0.000                                                      | 0.586       | 0.105                                                         | 0.327       | 0.123                                                        |  |
| Team Education                        | 0.074       | 0.005                                                      | -0.138      | 0.17                                                          | -0.121      | 0.044                                                        |  |
| Team Experience                       | -0.078      | 0.226                                                      | -0.371      | 0.119                                                         | -0.119      | 0.426                                                        |  |
| Female Co-Founders                    | 0.035       | 0.119                                                      | -0.119      | 0.168                                                         | -0.057      | 0.257                                                        |  |

  

| Panel C: Reduction in Exit Barriers |             | Differences-in-Differences (DD)<br>Exit Barriers Reduced |             | Triple Differences (DDD)<br>Exit and Entry Barriers Reduced |             | Triple Differences (DDD)<br>Exit and Growth Barriers Reduced |  |
|-------------------------------------|-------------|----------------------------------------------------------|-------------|-------------------------------------------------------------|-------------|--------------------------------------------------------------|--|
| Outcome                             | coefficient | p-value                                                  | coefficient | p-value                                                     | coefficient | p-value                                                      |  |
| Network Development                 | 0.147       | 0.077                                                    | -0.138      | 0.459                                                       | -0.043      | 0.827                                                        |  |
| Business Skills Development         | 0.142       | 0.099                                                    | -0.141      | 0.463                                                       | -0.212      | 0.295                                                        |  |
| Securing Direct Venture Funding     | 0.308       | 0.001                                                    | 0.14        | 0.487                                                       | 0.327       | 0.123                                                        |  |
| Team Education                      | 0.126       | 0.000                                                    | -0.074      | 0.189                                                       | -0.121      | 0.044                                                        |  |
| Team Experience                     | 0.039       | 0.547                                                    | 0.052       | 0.712                                                       | -0.119      | 0.426                                                        |  |
| Female Co-Founders                  | 0.01        | 0.628                                                    | -0.055      | 0.252                                                       | -0.057      | 0.257                                                        |  |

Table A7: Robustness Checks: Triple Differences Effects on Applicant Pool

| Panel A: Reduction in Entry Barriers      |             | Differences-in-Differences (DD)<br>Entry Barriers Reduced |             | Triple Differences (DDD)<br>Entry and Growth Barriers Reduced |             | Triple Differences (DDD)<br>Entry and Exit Barriers Reduced |  |
|-------------------------------------------|-------------|-----------------------------------------------------------|-------------|---------------------------------------------------------------|-------------|-------------------------------------------------------------|--|
| Outcome                                   | coefficient | p-value                                                   | coefficient | p-value                                                       | coefficient | p-value                                                     |  |
| Number of Applicants                      | 128.231     | 0.000                                                     | 144.127     | 0.000                                                         | 295.228     | 0.000                                                       |  |
| Prob. Selected                            | -0.049      | 0.003                                                     | -0.096      | 0.153                                                         | -0.079      | 0.034                                                       |  |
| Applicant Heterogeneity (Industry, Stage) | 4.995       | 0.000                                                     | 15.436      | 0.001                                                         | 8.343       | 0.002                                                       |  |
| Log(Revenue+1)                            | 0.312       | 0.159                                                     | -2.869      | 0.002                                                         | -2.841      | 0.000                                                       |  |
| Log(Employees+1)                          | 0.111       | 0.019                                                     | -0.623      | 0.001                                                         | -0.603      | 0.000                                                       |  |
| Log(Patents+1)                            | 0.009       | 0.614                                                     | 0.046       | 0.52                                                          | 0.025       | 0.533                                                       |  |

  

| Panel B: Reduction in Growth Barriers     |             | Differences-in-Differences (DD)<br>Growth Barriers Reduced |             | Triple Differences (DDD)<br>Growth and Entry Barriers Reduced |             | Triple Differences (DDD)<br>Growth and Exit Barriers Reduced |  |
|-------------------------------------------|-------------|------------------------------------------------------------|-------------|---------------------------------------------------------------|-------------|--------------------------------------------------------------|--|
| Outcome                                   | coefficient | p-value                                                    | coefficient | p-value                                                       | coefficient | p-value                                                      |  |
| Number of Applicants                      | 136.837     | 0.000                                                      | 144.127     | 0.000                                                         | 266.223     | 0.000                                                        |  |
| Prob. Selected                            | -0.064      | 0.000                                                      | -0.096      | 0.153                                                         | -0.1        | 0.011                                                        |  |
| Applicant Heterogeneity (Industry, Stage) | 6.301       | 0.000                                                      | 15.436      | 0.001                                                         | 9.319       | 0.001                                                        |  |
| Log(Revenue+1)                            | 0.661       | 0.006                                                      | -2.869      | 0.002                                                         | -0.931      | 0.348                                                        |  |
| Log(Employees+1)                          | 0.279       | 0.000                                                      | -0.623      | 0.001                                                         | -0.091      | 0.705                                                        |  |
| Log(Patents+1)                            | 0.01        | 0.588                                                      | 0.046       | 0.52                                                          | 0.092       | 0.216                                                        |  |

  

| Panel C: Reduction in Exit Barriers       |             | Differences-in-Differences (DD)<br>Exit Barriers Reduced |             | Triple Differences (DDD)<br>Exit and Entry Barriers Reduced |             | Triple Differences (DDD)<br>Exit and Growth Barriers Reduced |  |
|-------------------------------------------|-------------|----------------------------------------------------------|-------------|-------------------------------------------------------------|-------------|--------------------------------------------------------------|--|
| Outcome                                   | coefficient | p-value                                                  | coefficient | p-value                                                     | coefficient | p-value                                                      |  |
| Number of Applicants                      | 58.853      | 0.000                                                    | 295.228     | 0.000                                                       | 266.223     | 0.000                                                        |  |
| Prob. Selected                            | -0.066      | 0.000                                                    | -0.079      | 0.034                                                       | -0.1        | 0.011                                                        |  |
| Applicant Heterogeneity (Industry, Stage) | 6.647       | 0.000                                                    | 8.343       | 0.002                                                       | 9.319       | 0.001                                                        |  |
| Log(Revenue+1)                            | 1.538       | 0.000                                                    | -2.841      | 0.000                                                       | -0.931      | 0.348                                                        |  |
| Log(Employees+1)                          | 0.505       | 0.000                                                    | -0.603      | 0.000                                                       | -0.091      | 0.705                                                        |  |
| Log(Patents+1)                            | 0.045       | 0.010                                                    | 0.025       | 0.533                                                       | 0.092       | 0.216                                                        |  |

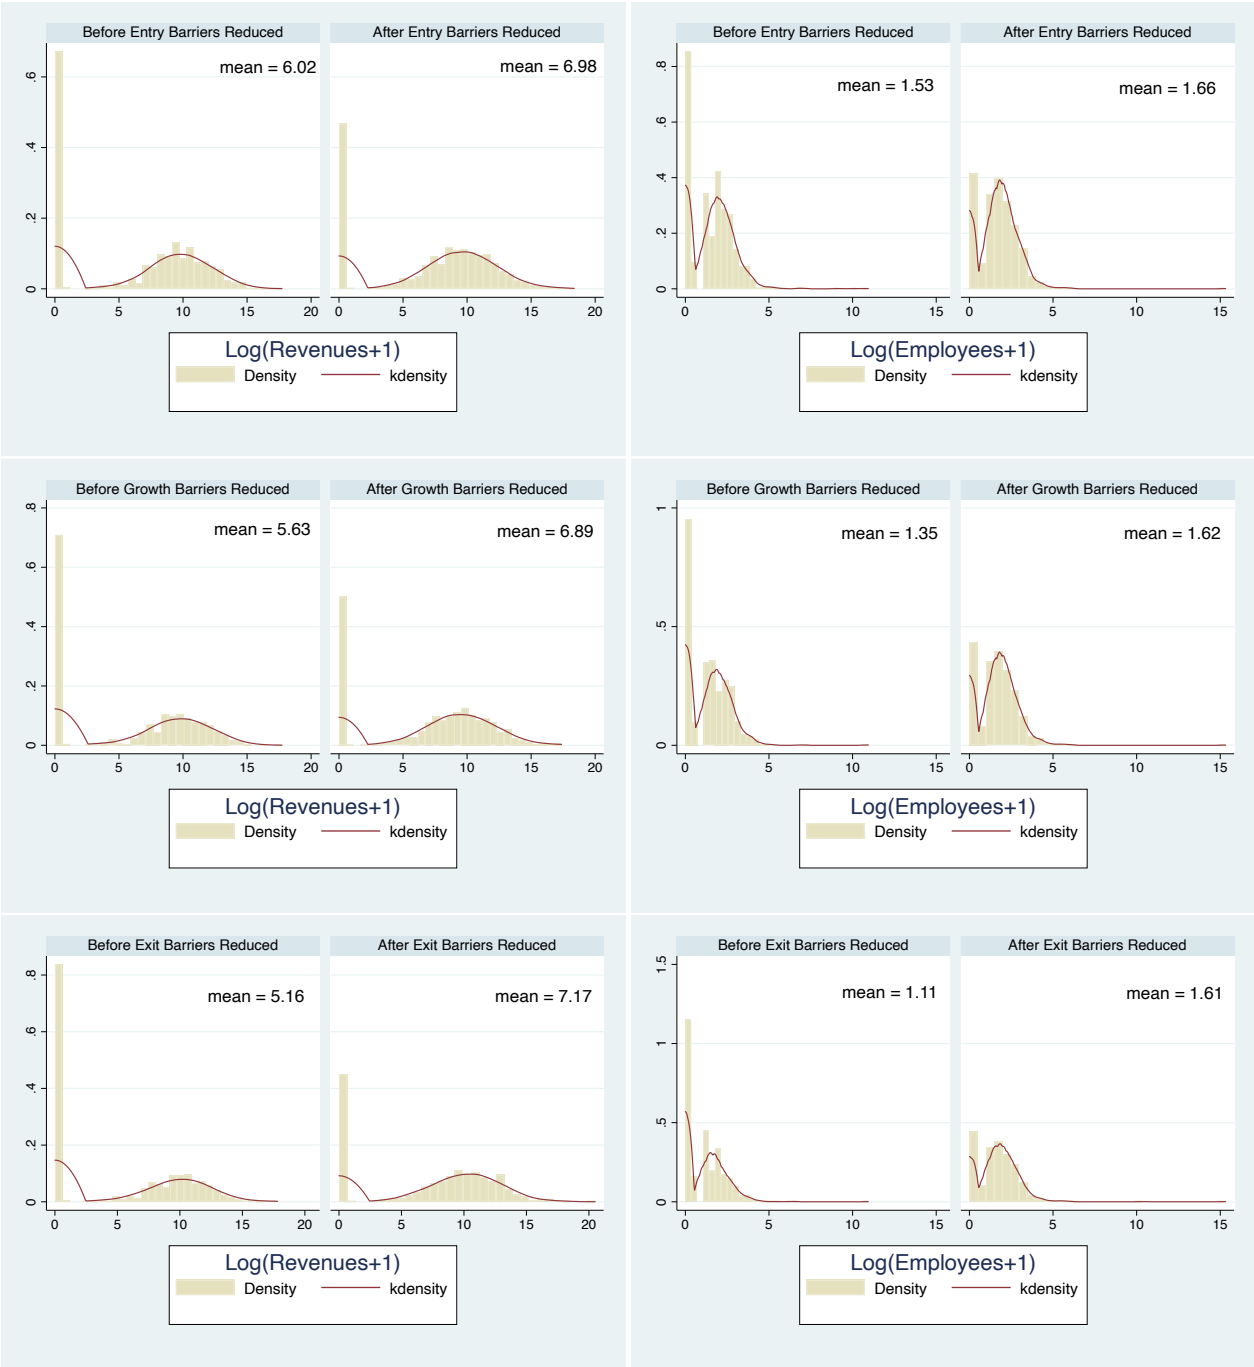

Figure A2: Shift in Applicant Quality Distribution Following Institutional Changes

Table A8: Split Sample Results for Perceived Benefits of Accelerators for Securing Venture Funding

|                              | Access to Funding<br>Among Top Three<br>Benefits of Accelerator |                                   | Funding Not a<br>Primary Benefit<br>of Accelerator |         |
|------------------------------|-----------------------------------------------------------------|-----------------------------------|----------------------------------------------------|---------|
|                              | Perceived Benefits:<br>coefficient                              | Direct Venture Funding<br>p-value | coefficient                                        | p-value |
| Reduction in Entry Barriers  | -0.061                                                          | 0.497                             | 0.047                                              | 0.879   |
| Reduction in Growth Barriers | -0.01                                                           | 0.921                             | 0.075                                              | 0.805   |
| Reduction in Exit Barriers   | 0.346                                                           | 0.000                             | 0.284                                              | 0.216   |

## B Data and Methodology Supplement

### B.1 World Bank Doing Business Data

The Doing Business methodology is detailed at: <https://www.doingbusiness.org/en/methodology>. The World Bank has been collecting information about the quality of institutions affecting firms and private sector development within 190 economies around the world since 2005. As part of these efforts, the methodology team has collected information about multiple aspects of firms' institutional environments, including the laws and regulations affecting formal entry, the process of obtaining credit, and the process of resolving insolvency. Figure A3 provides a snapshot of the business reform summaries and a sample survey questionnaire used to collect information about reforms affecting the process of forming a new business (note that the full questionnaire is available at the link provided above).

The reforms that I look at in this study involve the process of forming new firms, obtaining credit, and resolving insolvency. These represent changes in the legal and regulatory barriers to new entry, growth, and exit for entrepreneurs. Figure A4 below provides a visual summary of the processes involved for each of these stages of new firm formation, funding, and management, based on the World Bank unified methodology in 190 countries since 2005. The methodology that the World Bank Doing Business team uses is based on seminal work by ? (2002) on the regulation of entry. Legal and regulatory barriers are therefore translated into the total cost and time (in days) required to complete the set of steps that are needed to begin formal operations, obtain credit, and recover from insolvency.

In this study, reforms are coded as binary variables for whether a country in the sample (country

## Business Reform Summaries

In the past year, *Doing Business* observed a peaking of reform activity worldwide. From June 2, 2017, to May 1, 2018, 128 economies implemented a record 314 regulatory reforms improving the business climate. Almost one-third of all reforms recorded in 2017/18 were implemented in two areas—starting a business and enforcing contracts. The economies of Europe and Central Asia and Sub-Saharan Africa were the most active in reforming their regulatory frameworks in 2017/18: four of every five economies substantially improved business regulations in both regions. With a total of 107 reforms, Sub-Saharan Africa once again has a record number this year. Since *Doing Business 2005* more than 3,500 business regulatory reforms have been implemented across the 190 economies measured by *Doing Business*. The majority of these reforms have been made in low- and lower-middle-income economies. [View a breakdown of reforms since \*Doing Business 2005\*](#). Please note that short summaries of *Doing Business* reforms are available from *Doing Business 2008*

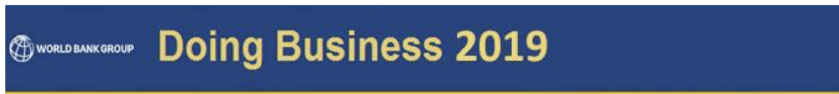

### 2. REFORM UPDATE

When answering the questions below, please use the case study assumptions provided in section 1.

**2.1 Has there been any reform (in practice or in laws and regulations) related to the process of starting a business SINCE June 1, 2017?**

If applicable, please indicate the name and date of the law and provide an online link to the legal text:

| Response          | If yes, has this reform simplified or complicated the process of starting a business? Please explain: |
|-------------------|-------------------------------------------------------------------------------------------------------|
| -Click to Select- |                                                                                                       |

**2.2 Are you aware of any reform (in practice or in laws and regulations) related to the process of starting a business that is expected to be adopted PRIOR TO May 1, 2018?**

| Response          | If yes, is this reform expected to simplify or complicate the process of starting a business? Please explain: |
|-------------------|---------------------------------------------------------------------------------------------------------------|
| -Click to Select- |                                                                                                               |

**2.3 Are you aware of any reform (in practice or in laws and regulations) related to the process of starting a business that is ongoing and is expected to be adopted AFTER May 1, 2018?**

| Response          | If yes, is this reform expected to simplify or complicate the process of starting a business? Please explain: |
|-------------------|---------------------------------------------------------------------------------------------------------------|
| -Click to Select- |                                                                                                               |

**2.4 How many «DB\_sb\_CompanyType» registrations did you or your company oversee in the past year?**  
-Click to Select-

Figure A3: Business Reforms Summaries and Survey Instruments

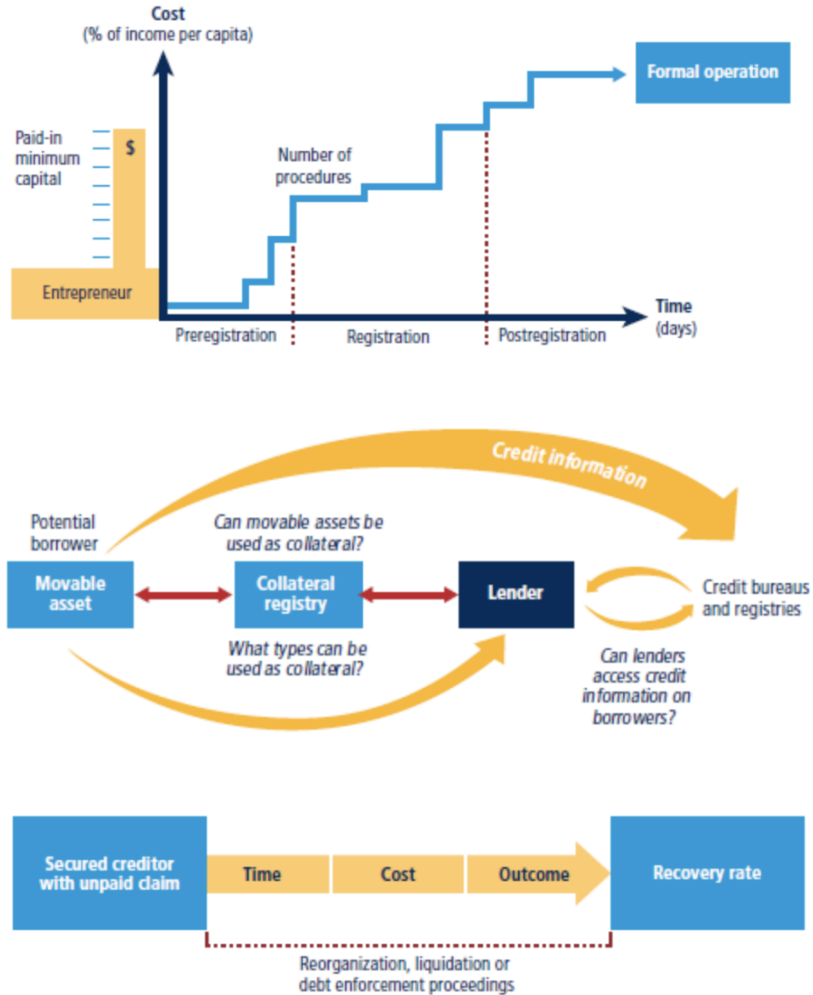

Figure A4: Barriers to Entry, Growth, and Exit

of operations for applicants, country of operations for sponsors) implemented reforms that streamlined and improved the process of forming new firms (entry barriers reduced), obtaining credit (growth barriers reduced), and resolving insolvency (exit barriers reduced) for entrepreneurs. I look specifically at reforms that occurred in the middle of the three-year sample period (2016-2018) in 2017, to enable comparisons of the before and after reform periods using difference-in-differences models.

## B.2 Accelerator Applicants Data

The accelerator applicant data methodology, implemented by the Aspen Network for Development Entrepreneurs (ANDE) is available at: <http://www.galidata.org>. The raw sample includes data from

19,418 early-stage ventures collected from surveys of entrepreneurs who applied to participating programs (accelerators in the sampling frame). Of these, I restricted the set to only for-profit startups with known countries of operation, leaving me with a sample of 13,770 applicants over 2016-2018.

To collect these data ANDE administered a survey to over 1,000 organizations in the sampling frame that indicated they ran accelerator programs to understand the structure and format of the accelerator programs, the types of applicants that were selected into these programs, where the applicants and programs were located, and what types of support services and funding the accelerators provided. ANDE received 213 responses in total, for a response rate of 21.3 percent. Of these, ANDE excluded 49 programs and organizations because they did not meet the inclusion criteria above, resulting in a sample of 164 organizations headquartered in 41 countries that supported more than 8,000 ventures. Eighty-six of these programs were headquartered in emerging markets, and 86 programs focused explicitly on supporting ventures with a social or environmental mission. The majority of organizations in the sample ran their first accelerator program after 2010.

Table A9 provides the summary statistics for applicants to venture accelerators in this sample between 2016-2018. Cohort selection decisions made by accelerators in this sample were coded based on whether applicants were selected by the accelerator, whether applicants joined the accelerator conditional on being selected, and whether applicants finished conditional on joining. Figure A5 maps the heterogeneity in accelerator selectivity across countries in the sample. Selectivity is measured as the proportion of all applicants to each program that were rejected.

Table A9: Summary Statistics for Applicants over 2016-2018

| Application Year | Total Applicants | Applicants Per Cohort | Selected Per Cohort (count) | Joined Per Cohort (count) |
|------------------|------------------|-----------------------|-----------------------------|---------------------------|
| 2016             | 4,194            | 82.4                  | 9.9                         | 8.9                       |
| 2017             | 4,667            | 66.3                  | 7.7                         | 7.3                       |
| 2018             | 4,909            | 101.1                 | 13.8                        | 12.4                      |
|                  | 13,770           | 83.6                  | 10.6                        | 9.6                       |

Table A10 provides the sample's distribution by world region, based on regional classification used by the World Bank and United Nations. Table A11 provides the list of countries included in the sample. Figure A5 maps the average selectivity (measured as the proportion of applicants that

were rejected) by accelerator programs in the sample.

Table A10: Sample Distribution by World Region

| Region                          | Percent | Cum.  |
|---------------------------------|---------|-------|
| East Asia and Pacific           | 14.89   | 14.89 |
| Europe and Central Asia         | 3.45    | 18.35 |
| Latin America and the Caribbean | 38.35   | 56.7  |
| Middle East and North Africa    | 0.86    | 57.56 |
| North America                   | 17.72   | 75.28 |
| Sub-Saharan Africa              | 24.72   | 100   |
| Total                           | 100%    |       |

Figure A6 shows applicants' composition by sector. As this figure shows, the largest sector/industry was healthcare and the life sciences (26%), followed by agriculture and food (25%), and information and communication technology (ICT) (21%). Figure A7 shows applicant composition by stage. The majority of applicants in the data were at the early-stage and growth stage of venture development.

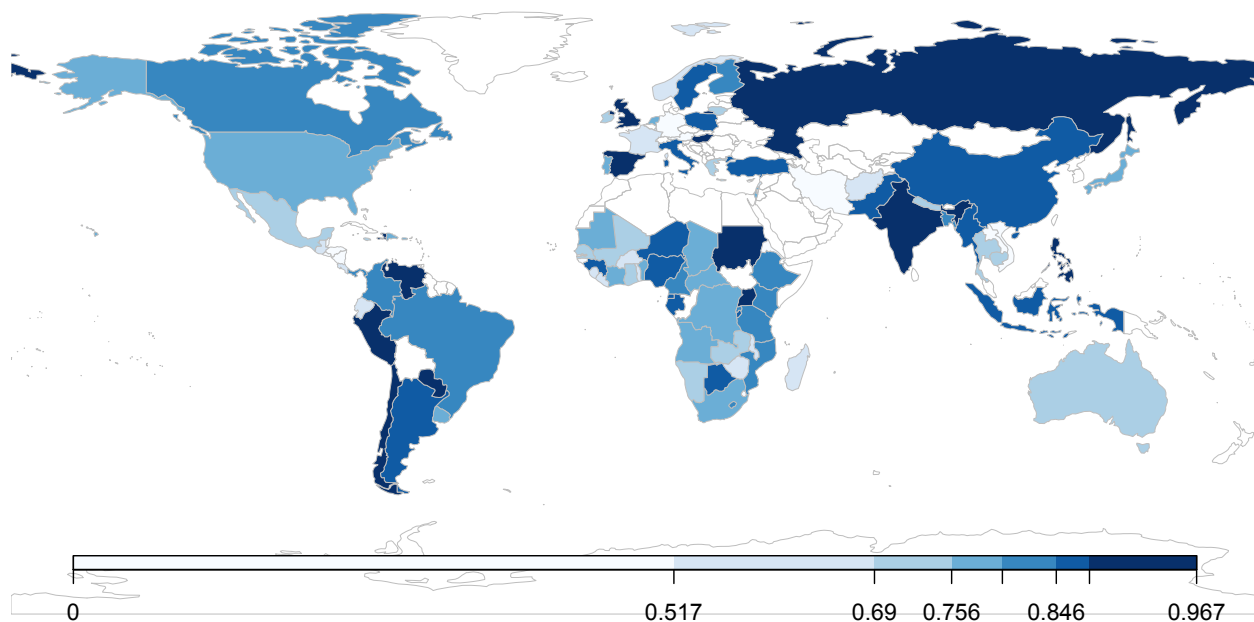

Figure A5: Average Accelerator Selectivity (Proportion of Applicants Rejected)

Figure A8 shows the composition of accelerators in the sample by founding year (age). The majority of accelerators in the sample were founded after 2013. Figure A9 shows accelerator composition by objectives. The primary objectives of most accelerators in the sample were to help ventures

Table A11: List of Countries Included in the Sample

|    |                          |     |                      |     |                       |     |                      |
|----|--------------------------|-----|----------------------|-----|-----------------------|-----|----------------------|
| 1  | Afghanistan              | 51  | Eswatini             | 101 | Mexico                | 151 | Tajikistan           |
| 2  | Albania                  | 52  | Ethiopia             | 102 | Moldova               | 152 | Tanzania             |
| 3  | Algeria                  | 53  | Fiji                 | 103 | Monaco                | 153 | Thailand             |
| 4  | Angola                   | 54  | Finland              | 104 | Mongolia              | 154 | Togo                 |
| 5  | Argentina                | 55  | France               | 105 | Morocco               | 155 | Tonga                |
| 6  | Armenia                  | 56  | Gabon                | 106 | Mozambique            | 156 | Trinidad and Tobago  |
| 7  | Australia                | 57  | Gambia, The          | 107 | Myanmar               | 157 | Tunisia              |
| 8  | Austria                  | 58  | Georgia              | 108 | Namibia               | 158 | Turkey               |
| 9  | Azerbaijan               | 59  | Germany              | 109 | Nepal                 | 159 | Uganda               |
| 10 | Bahamas, The             | 60  | Ghana                | 110 | Netherlands           | 160 | Ukraine              |
| 11 | Bangladesh               | 61  | Greece               | 111 | New Zealand           | 161 | United Arab Emirates |
| 12 | Barbados                 | 62  | Guatemala            | 112 | Nicaragua             | 162 | United Kingdom       |
| 13 | Belarus                  | 63  | Guinea               | 113 | Niger                 | 163 | United States        |
| 14 | Belgium                  | 64  | Guinea-Bissau        | 114 | Nigeria               | 164 | Uruguay              |
| 15 | Belize                   | 65  | Guyana               | 115 | Norway                | 165 | Uzbekistan           |
| 16 | Benin                    | 66  | Haiti                | 116 | Pakistan              | 166 | Venezuela, RB        |
| 17 | Bhutan                   | 67  | Honduras             | 117 | Panama                | 167 | Vietnam              |
| 18 | Bolivia                  | 68  | Hong Kong SAR, China | 118 | Papua New Guinea      | 168 | West Bank and Gaza   |
| 19 | Botswana                 | 69  | Hungary              | 119 | Paraguay              | 169 | Zambia               |
| 20 | Brazil                   | 70  | Iceland              | 120 | Peru                  | 170 | Zimbabwe             |
| 21 | Bulgaria                 | 71  | India                | 121 | Philippines           |     |                      |
| 22 | Burkina Faso             | 72  | Indonesia            | 122 | Poland                |     |                      |
| 23 | Burundi                  | 73  | Iran, Islamic Rep.   | 123 | Portugal              |     |                      |
| 24 | Cabo Verde               | 74  | Iraq                 | 124 | Puerto Rico           |     |                      |
| 25 | Cambodia                 | 75  | Ireland              | 125 | Romania               |     |                      |
| 26 | Cameroon                 | 76  | Israel               | 126 | Russian Federation    |     |                      |
| 27 | Canada                   | 77  | Italy                | 127 | Rwanda                |     |                      |
| 28 | Central African Republic | 78  | Jamaica              | 128 | Samoa                 |     |                      |
| 29 | Chad                     | 79  | Japan                | 129 | Sao Tome and Principe |     |                      |
| 30 | Chile                    | 80  | Jordan               | 130 | Saudi Arabia          |     |                      |
| 31 | China                    | 81  | Kazakhstan           | 131 | Senegal               |     |                      |
| 32 | Colombia                 | 82  | Kenya                | 132 | Serbia                |     |                      |
| 33 | Comoros                  | 83  | Kiribati             | 133 | Seychelles            |     |                      |
| 34 | Congo, Dem. Rep.         | 84  | Korea, Rep.          | 134 | Sierra Leone          |     |                      |
| 35 | Congo, Rep.              | 85  | Kuwait               | 135 | Singapore             |     |                      |
| 36 | Costa Rica               | 86  | Lao PDR              | 136 | Slovak Republic       |     |                      |
| 37 | Cote d'Ivoire            | 87  | Latvia               | 137 | Slovenia              |     |                      |
| 38 | Croatia                  | 88  | Lebanon              | 138 | Solomon Islands       |     |                      |
| 39 | Curacao                  | 89  | Lesotho              | 139 | Somalia               |     |                      |
| 40 | Cyprus                   | 90  | Liberia              | 140 | South Africa          |     |                      |
| 41 | Denmark                  | 91  | Libya                | 141 | South Sudan           |     |                      |
| 42 | Djibouti                 | 92  | Lithuania            | 142 | Spain                 |     |                      |
| 43 | Dominica                 | 93  | Luxembourg           | 143 | Sri Lanka             |     |                      |
| 44 | Dominican Republic       | 94  | Macedonia, FYR       | 144 | St. Kitts and Nevis   |     |                      |
| 45 | Ecuador                  | 95  | Madagascar           | 145 | St. Lucia             |     |                      |
| 46 | Egypt, Arab Rep.         | 96  | Malawi               | 146 | Sudan                 |     |                      |
| 47 | El Salvador              | 97  | Malaysia             | 147 | Sweden                |     |                      |
| 48 | Equatorial Guinea        | 98  | Mali                 | 148 | Switzerland           |     |                      |
| 49 | Eritrea                  | 99  | Mauritania           | 149 | Syrian Arab Republic  |     |                      |
| 50 | Estonia                  | 100 | Mauritius            | 150 | Taiwan, China         |     |                      |

gain market traction (59%), support the leadership development of the entrepreneurs (49%), and connect ventures to investment opportunities (46%). Figure A10 shows accelerator composition by program length. The majority of accelerators (62%) operated programs that ranged between 3-6 months in length. Figure A11 shows the composition of accelerators by program type. The majority of accelerators (62%) operated in-person programs (versus remote, or hybrid programs). Figure A12 shows accelerator composition by the source of funding. The primary source of funding for most programs were corporates (21%), philanthropy (19%), and government (18%). Figure A13 shows accelerator composition by the type of services provided. Most accelerators in the sample provided a combination of network connections (98%) , mentoring (95%), funding advice (89%), seminars and workshops for entrepreneurs (88%), and access to investors (87%). Finally, Figure A14 shows accelerator composition by the type of funding provided to startups. The majority of programs provided a combination of equity funding (55%), grants (28%), and debt/quasi-equity (21%).

|                                          |     |
|------------------------------------------|-----|
| Healthcare/Life Sciences                 | 26% |
| Agriculture & Food                       | 25% |
| Information and Communication Technology | 21% |
| Energy                                   | 18% |
| Financial Services                       | 16% |
| Environment                              | 15% |
| Consumer/Retail                          | 13% |
| Education                                | 13% |
| Water & Sanitation                       | 12% |
| Business Services                        | 10% |
| Logistics & Distribution                 | 9%  |
| Media & Entertainment                    | 8%  |
| Hospitality/Travel/Tourism               | 7%  |
| Real Estate                              | 1%  |
| Other                                    | 19% |
| No Sector Focus                          | 40% |

Figure A6: Applicant Composition by Sector

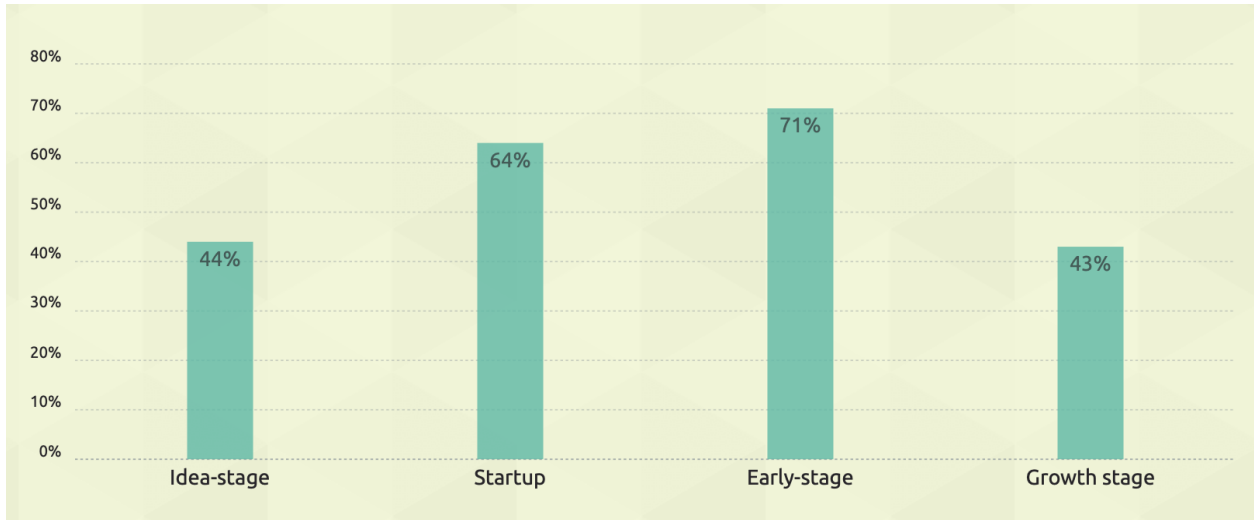

Figure A7: Applicant Composition by Stage

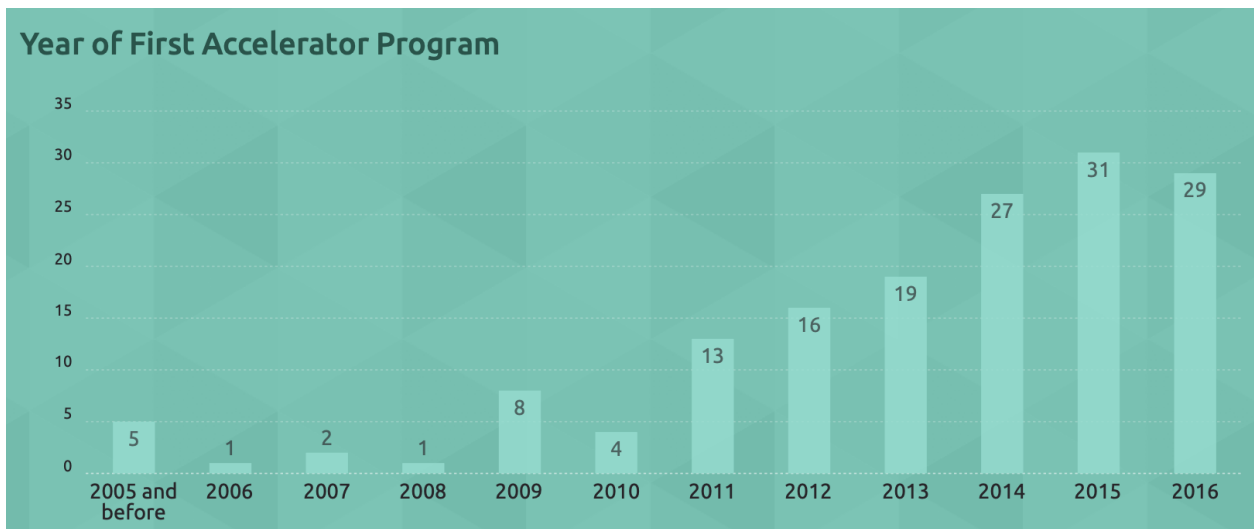

Figure A8: Accelerator Composition by Founding Year (Age)

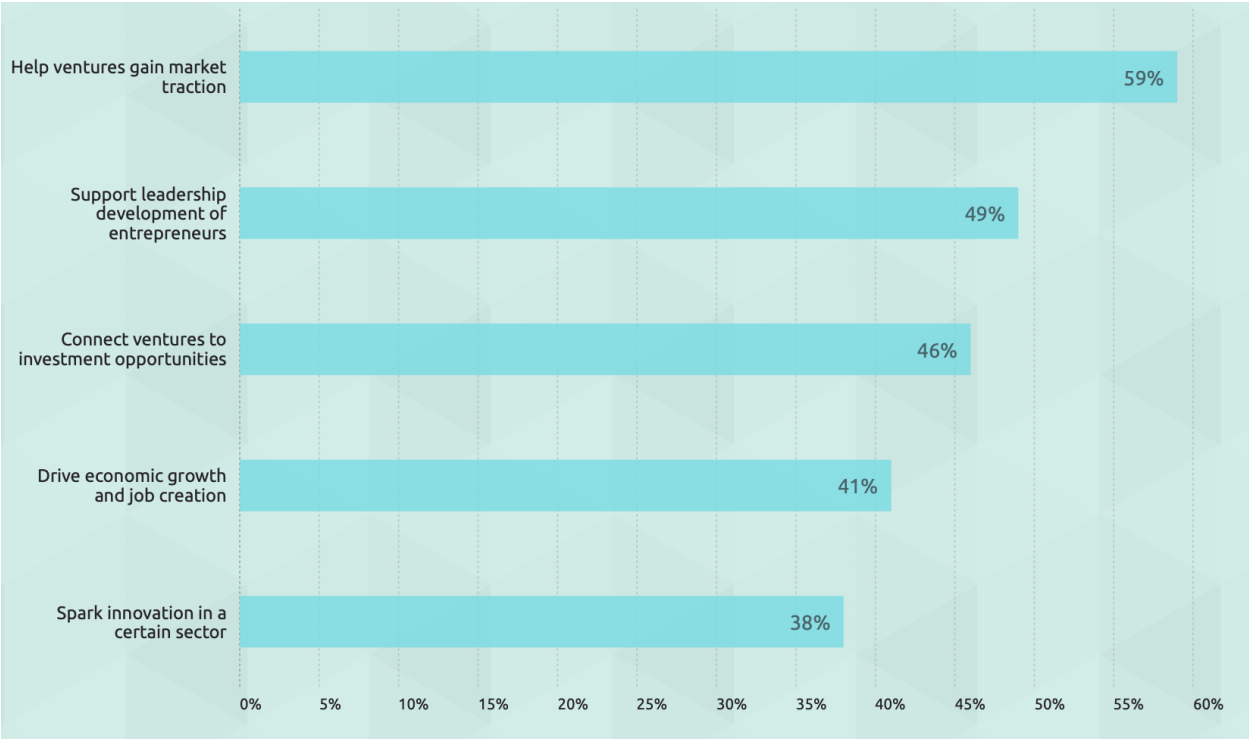

Figure A9: Accelerator Composition by Objectives

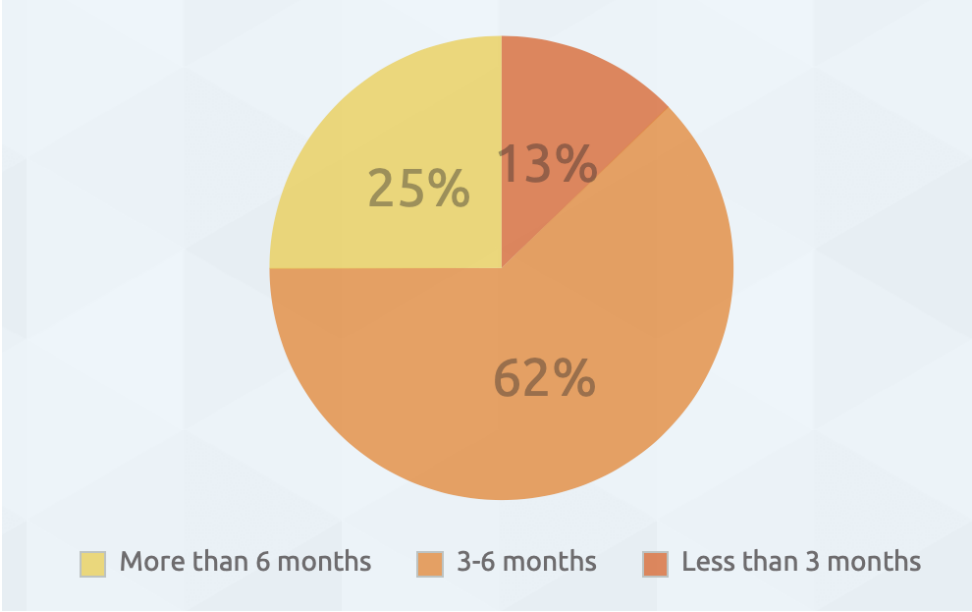

Figure A10: Accelerator Composition by Program Length

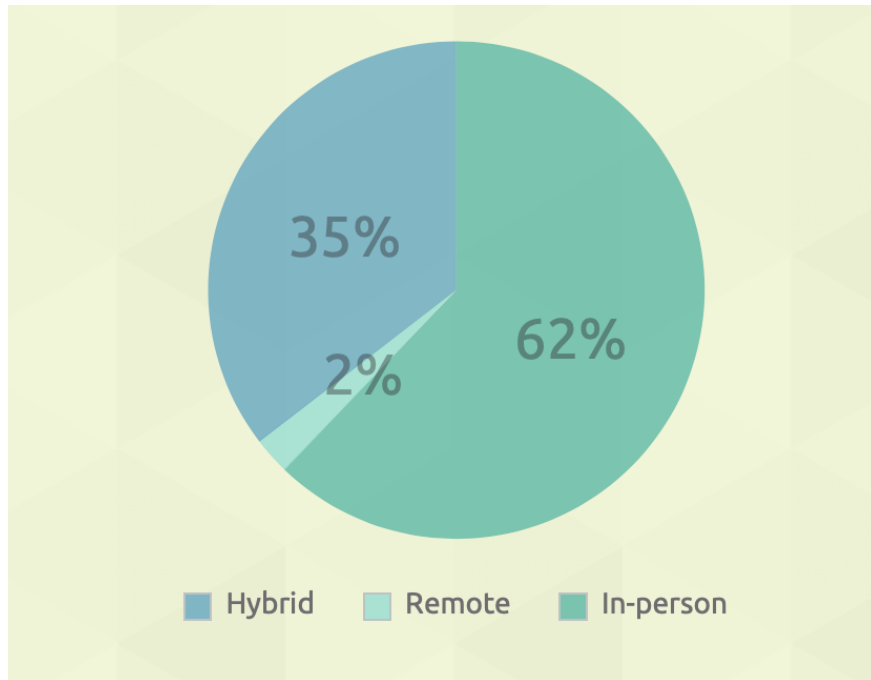

Figure A11: Accelerator Composition by Program Type

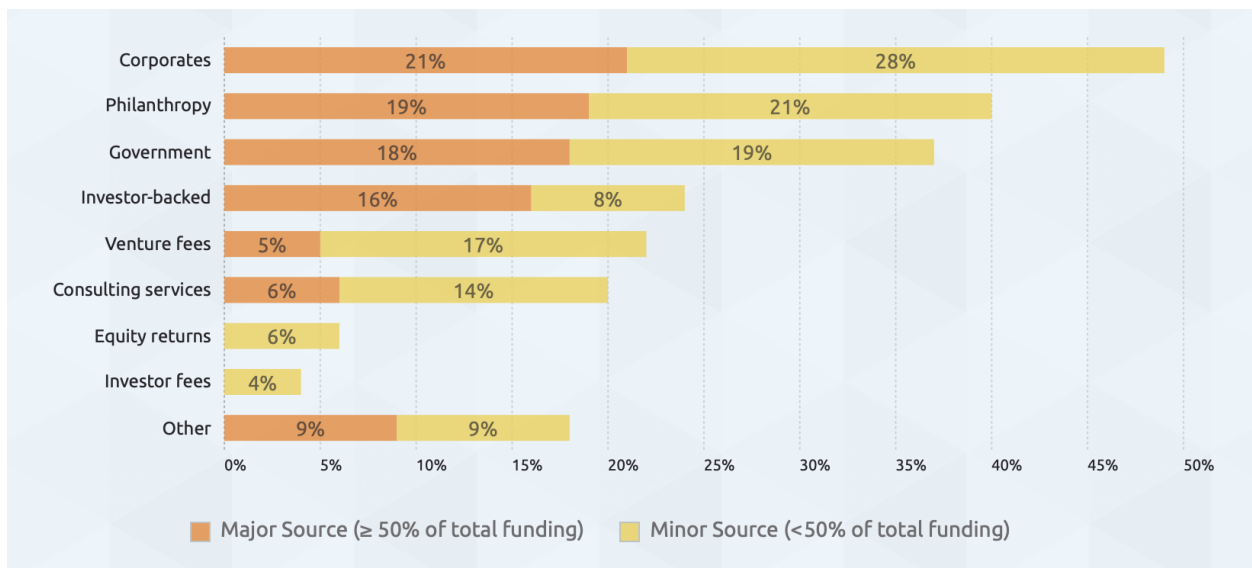

Figure A12: Accelerator Composition by Source of Funding

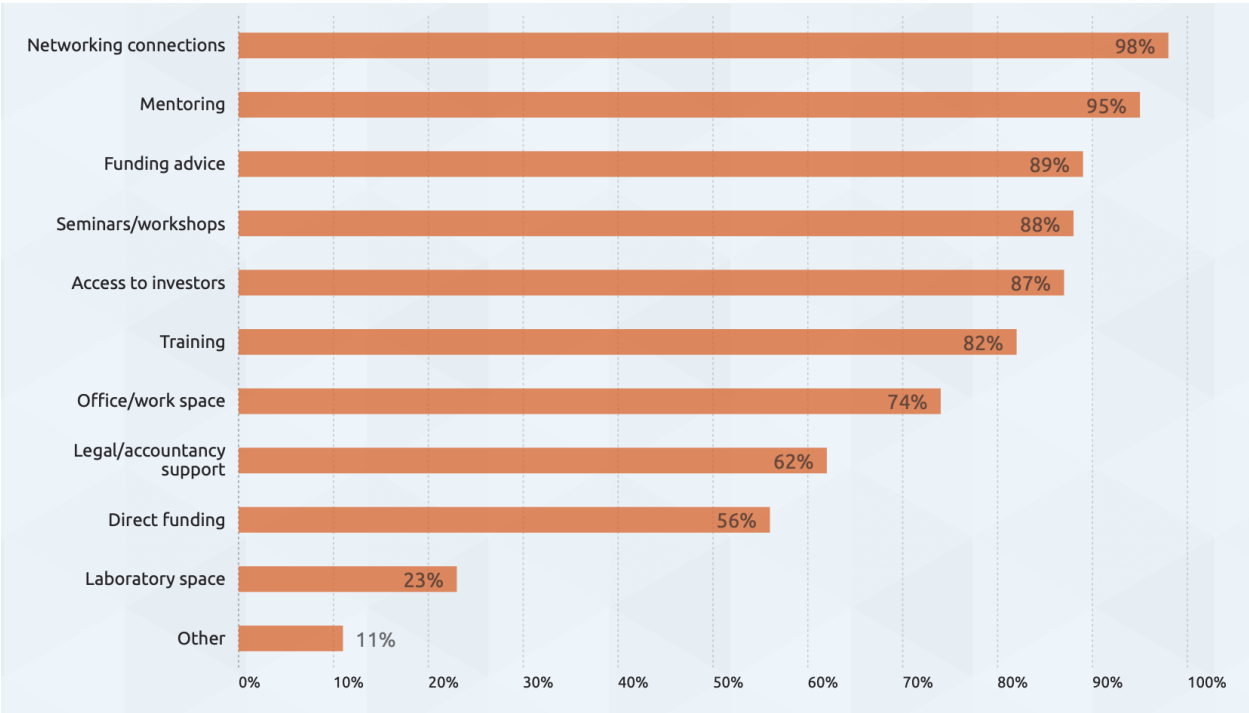

Figure A13: Accelerator Composition by Type of Services Provided to Startups (listed categories not mutually exclusive)

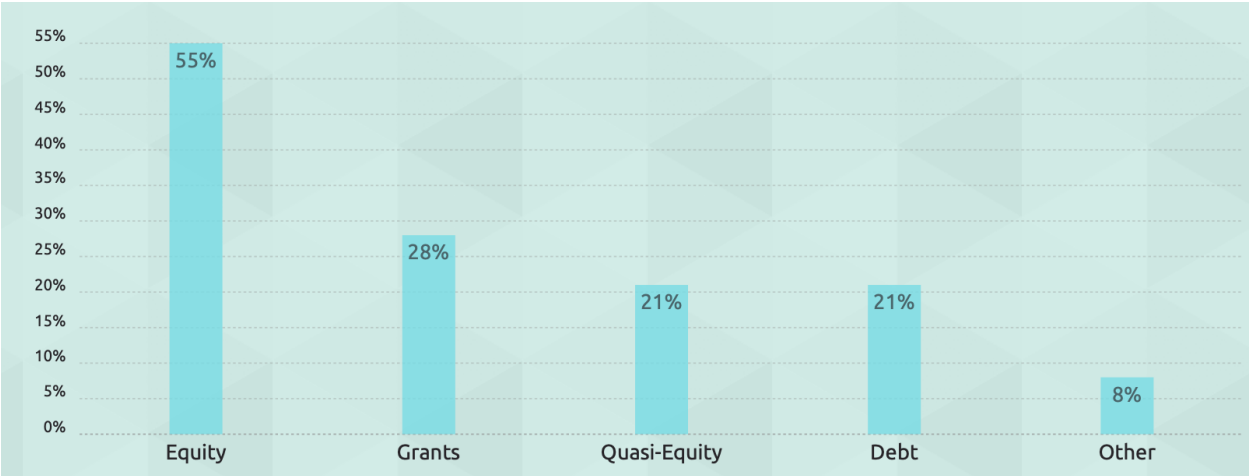

Figure A14: Accelerator Composition by Type of Funding Provided to Startups (listed categories not mutually exclusive)

## References

Djankov, S., R. La Porta, F. Lopez-de Silanes, and A. Shleifer (2002). The Regulation of Entry. *Quarterly Journal of Economics* 117(1), 1–37.
